**TENTATIVE PROGRAM FOR MID-WEST SECTIONAL  
MEETING OF THE AMERICAN SOCIETY OF  
ANESTHETISTS, INC.**

**STEVENS HOTEL, CHICAGO, ILL.**

**March 2 and 3, 1945**

*Friday, March 2, 9:00 a.m.*

University of Chicago.

Three Basic Science discussions by members of the Departments of Physiology and Pharmacology. These will be followed by luncheon at the University with a period devoted to the answering of questions by the members of those Departments.

*2:30 p.m.*

Stevens Hotel. Three papers will be presented:

Dr. Mary Karp: Intravenous Alcohol.

Dr. McCullough of the University of Illinois: Subject to be chosen later.

Dr. John S. Lundy: Anesthesia and Shock.

No dinner will be held Friday evening. Good North Side restaurants will be listed on the program.

*8:00 p.m.*

Meeting on McKinlock Campus.

Speaker: Dr. Andrew C. Ivy: Subject to be announced later.

*Saturday, March 3*

The morning will be left open for visits to hospitals or to the Abbott Laboratories.

*2:00 p.m.*

Panel discussions to be held in four rooms at the Stevens Hotel:

Dr. Stuart C. Cullen: Curare.

Dr. Hugh Brown: Continuous Caudal Anesthesia.

Dr. John S. Lundy, or a member of his Department: Supportive Therapy during Anesthesia and Surgery.

Capt. Edward B. Tuohy: Some Phase of Military Anesthesia.

*4:30 p.m.*

Cocktail party.

The purpose of the cocktail party will be to provide an opportunity for the newer members to talk with the older, more important members. The latter are asked to be sure to attend.

*Evening.*

Dinner at the Stevens Hotel at a cost of \$5.00 per person.

Following dinner, there will be a series of discussions on the specialty and economics in relation to the specialty.
